# Supplementary material for: Short- and long-term outcomes of pulmonary exposure to a sublethal dose of ricin in mice
Source: PubMed Central journal article supplement (PMC11109263; doi:10.1038/s41598-024-62222-9), 2024-05-21
Supplement: 41598_2024_62222_MOESM1_ESM.pdf [file 41598_2024_62222_MOESM1_ESM.pdf]

## Supplementary Figures

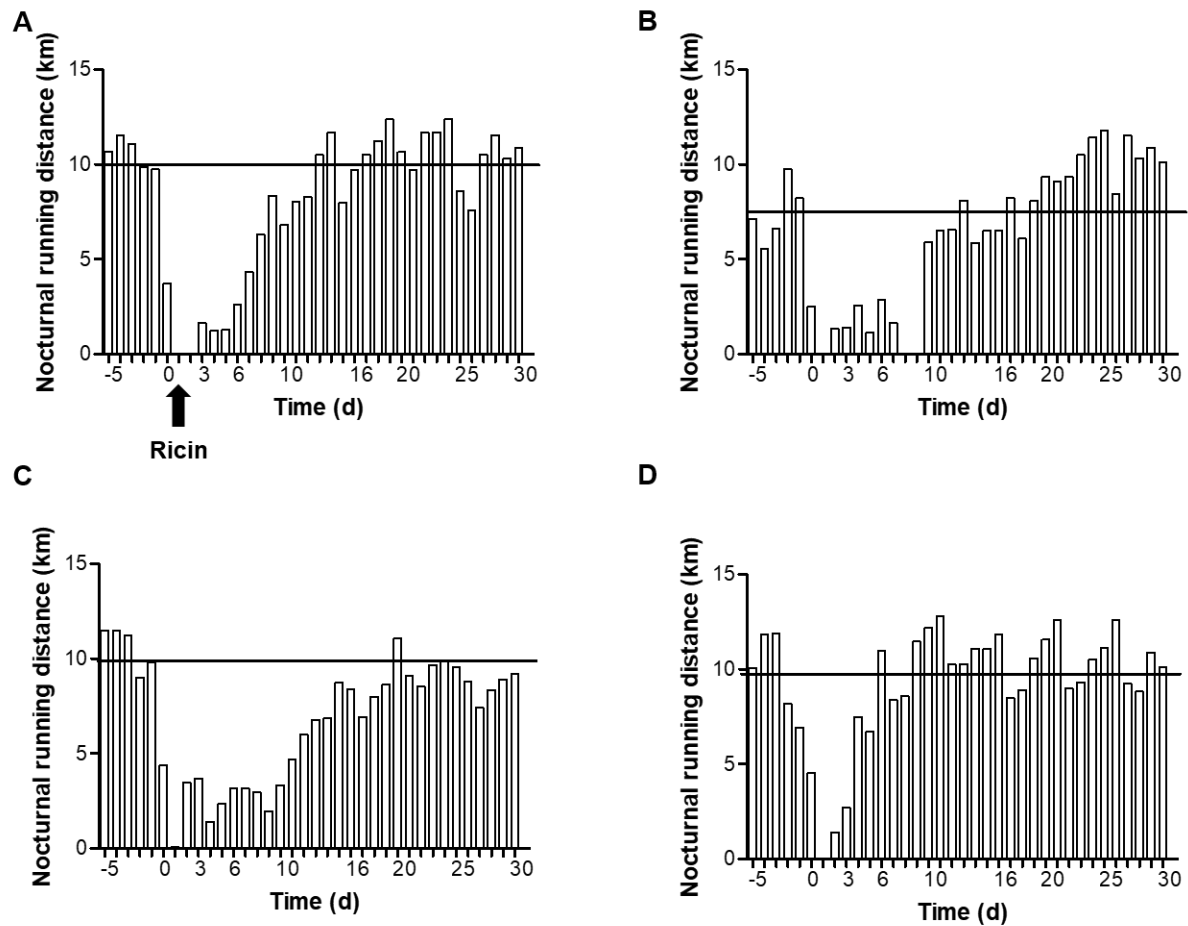

**Supplementary Figure 1.** Activity profile of individual mice according to voluntary wheel running following sublethal exposure to ricin toxin. The activity was recorded 5 days before intoxication for receiving consistent activity of each healthy mouse. Then, the mice were exposed to ricin and their running was further recorded for 30 days following intoxication. (A,B,C,D) Representative activity profile of four different mice. Horizontal line indicated the average running distance of the mouse prior to intoxication. The time-point 0 represented ricin intoxication.

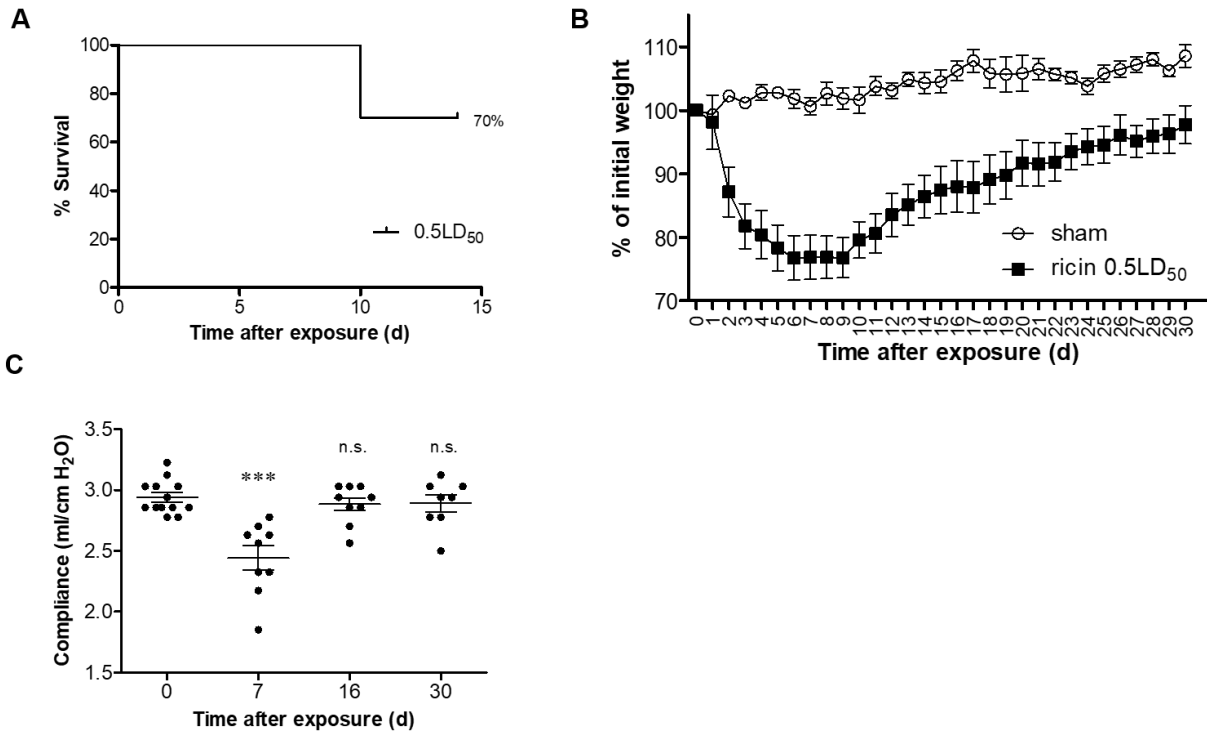

**Supplementary Figure 2.** Physiological and functional changes in mice following exposure to partially lethal dose of ricin toxin. Mice were intranasally intoxicated with 0.5LD<sub>50</sub> (2.4 μg/kg body weight) ricin and monitored for morbidity. **(A)** Survival ( $n=10$ ), **(B)** body weight loss ( $n=5-7$ ) and **(C)** lung compliance ( $n=8-13$ ). Each dot represents one animal. Data are represented as means  $\pm$  SEM. \*\*\* $P < 0.0001$ , n.s., not significant, in comparison to non-intoxicated mice.

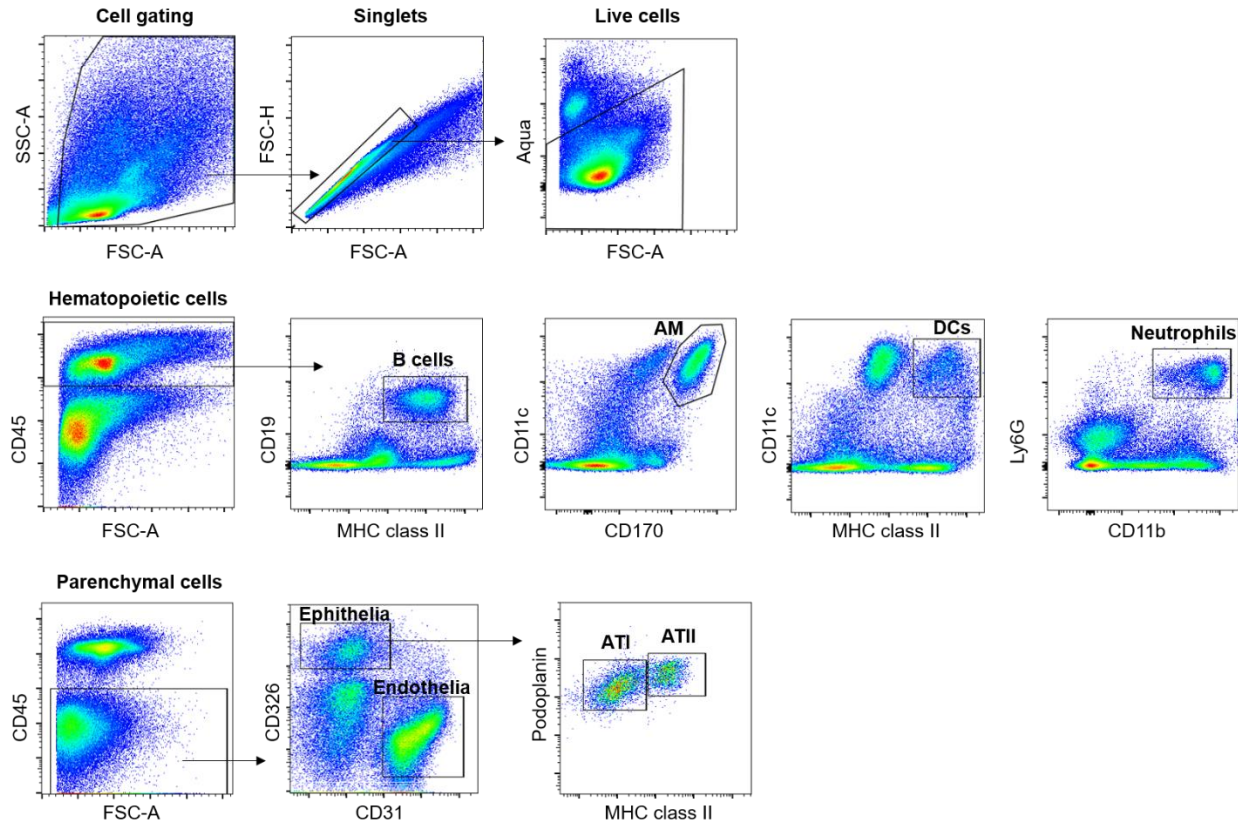

**Supplementary Figure 3.** Gating strategy to identify differential cell populations in the lungs. Cells were gated for intact singlets and live (Aqua<sup>neg</sup> cells) cells. For hematopoietic cell identification, cells were gated for CD45<sup>high</sup> cells. B cells were identified as CD19<sup>high</sup> and MHC class II<sup>high</sup> cells, alveolar macrophages (AM) as CD11c<sup>high</sup> and CD170<sup>high</sup>, dendritic cells (DCs) as CD11c<sup>high</sup>, CD170<sup>low</sup> and MHC class II<sup>high</sup> and neutrophils as Ly6G<sup>high</sup> and CD11b<sup>high</sup>. Lung parenchymal cells were first defined as CD45<sup>neg</sup> cells. Then, endothelial and epithelial cells were gated as CD326<sup>neg</sup>, CD31<sup>high</sup> and CD326<sup>high</sup>, CD31<sup>neg</sup>, respectively. Epithelial cells were segregated into alveolar epithelial type I (ATI) and alveolar epithelial type II (ATII) cells by gating Podoplanin<sup>high</sup>, MHC class II<sup>low</sup> and Podoplanin<sup>high</sup>, MHC class II<sup>high</sup> cells<sup>43</sup>, respectively.

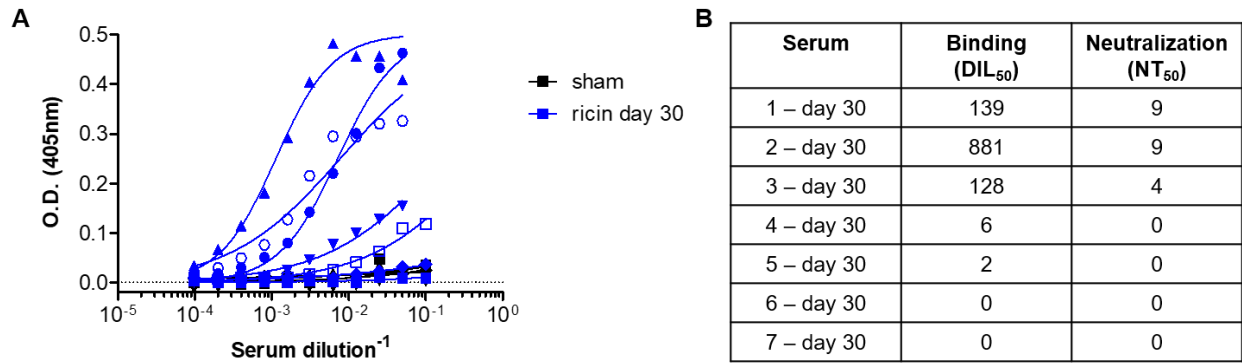

**Supplementary Figure 4.** Development of intrinsic antibody response in mice following sublethal exposure to ricin toxin. Mice were intranasally intoxicated with (1.7  $\mu\text{g}/\text{kg}$  body weight) ricin and their sera were characterized. **(A)** The sera at various dilutions were tested for presence of ricin-binding antibodies by ELISA. Each curve represents single mouse. Black line, sham; blue line, serum of mice at day 30 after ricin intoxication; ( $n=5-7$ ). **(B)** Summary of antibody titer (DIL<sub>50</sub>) and neutralization potency (NT<sub>50</sub>) values from serum of mice 30 days after ricin exposure, ( $n=7$ ).
